# Supplementary material
Source: MDPI journal article supplement (https://www.mdpi.com/2073-4441/6/6/1698)
Supplement: s1 [file s1]

Supporting Information

S1. Quantification of Crop Water Requirement

The study assesses the “crop water requirement” from the evapotranspiration of major crops grown in different time period and in different regions of Thailand. The evapotranspiration (*ET*) or water requirement of the selected crops calculated from the equation:

| . | (1) |
| --- | --- |

*ET*crop has been classified into blue and green water footprint by using the basis that the water for growing crop within the watershed is from rain or irrigation. The “green water footprint (*WF*green)” of crops is evaluated by comparing the monthly evapotranspiration (*ET*) of crops during the growing period (in each province and watershed) with the effective rainfall available during the crop period (in each province and watershed). Then, if *ET* > effective rainfall available; *WF*green will be equal to the effective rainfall; however, if *ET* < effective rainfall available; *WF*green will be equal to ET. The “blue water footprint (*WF*blue)” of crops is evaluated as the “irrigation water” that is required to achieve the crop evapotranspiration if the rainfall infiltrating in the ground or effective rainfall is not enough *i.e.*, if *ET* > effective rainfall; *WF*blue = *ET* − effective rainfall; however, if *ET* < effective rainfall; *WF*blue = 0.

S1.1. Reference Crop Evapotranspiration (ET0)

*ET*0 is represented as an evapotranspiration process of a reference crop mainly driven by climate conditions at different location without affected by crop characteristics and soil factors. The standard condition referring to plentiful available soil water and good agricultural practices are managed to reach the complete growth period as well as to force on evapotranspiration of the reference crop influenced by climate factors; air temperature, relative humidity, wind speed, sunshine duration or cloudiness. Therefore, the *ET*0 by FAO Penman-Monteith method for the different provinces and regions in Thailand are referred from the Royal Irrigation Department (RID) as shown in Table S1. RID has calculated *ET*0 by using the Penman-Monteith method. The data used in the calculation are the monthly climatic data of 30 years (1981–2010) including Minimum Temperature, Maximum Temperature, Humidity (%), Wind (km/day), Sun hours, and Radiation (MJ/m2/day) reported by the Meteorological Department of Thailand.

**Table S1.** Reference crop evapotranspiration (*ET*0) [1].

| **Province** | ***ET*0 (mm/day)** | | | | | | | | | | | | |
| --- | --- | --- | --- | --- | --- | --- | --- | --- | --- | --- | --- | --- | --- |
| **Jan** | **Feb** | **Mar** | **Apr** | **May** | **Jun** | **Jul** | **Aug** | **Sep** | **Oct** | **Nov** | **Dec** | **Average** |
| Mae Hong Son | 2.86 | 3.71 | 4.65 | 5.17 | 4.41 | 3.26 | 2.88 | 3.02 | 3.09 | 3.21 | 2.98 | 2.76 | 3.5 |
| Chiang Rai | 2.81 | 3.46 | 4.33 | 4.91 | 4.24 | 3.93 | 3.47 | 3.33 | 3.58 | 3.41 | 3.16 | 2.64 | 3.6 |
| Phayao | 2.83 | 3.53 | 4.45 | 4.91 | 4.40 | 3.69 | 3.58 | 3.38 | 3.40 | 3.23 | 2.92 | 2.58 | 3.6 |
| Chiang Mai | 3.15 | 4.05 | 5.05 | 5.38 | 4.26 | 3.91 | 3.34 | 3.35 | 3.33 | 3.45 | 3.24 | 2.90 | 3.8 |
| Lampang | 3.16 | 3.84 | 4.78 | 4.99 | 4.20 | 3.93 | 3.61 | 3.47 | 3.43 | 3.45 | 3.34 | 3.00 | 3.8 |
| Lamphun | 2.94 | 3.79 | 4.73 | 5.46 | 4.56 | 3.78 | 3.68 | 3.47 | 3.47 | 3.35 | 3.06 | 2.74 | 3.8 |
| Phrae | 2.98 | 3.70 | 4.48 | 4.91 | 4.57 | 3.73 | 3.59 | 3.44 | 3.50 | 3.41 | 3.17 | 2.68 | 3.7 |
| Nan | 2.95 | 3.60 | 4.52 | 4.76 | 4.27 | 3.86 | 3.51 | 3.17 | 3.57 | 3.63 | 3.19 | 2.77 | 3.6 |

**Table S1.** *Cont.*

| **Province** | ***ET*0 (mm/day)** | | | | | | | | | | | | |
| --- | --- | --- | --- | --- | --- | --- | --- | --- | --- | --- | --- | --- | --- |
| **Jan** | **Feb** | **Mar** | **Apr** | **May** | **Jun** | **Jul** | **Aug** | **Sep** | **Oct** | **Nov** | **Dec** | **Average** |
| Uttaradit | 3.25 | 3.88 | 4.77 | 4.91 | 4.43 | 3.59 | 3.50 | 3.40 | 3.52 | 3.59 | 3.48 | 2.99 | 3.8 |
| Tak | 3.40 | 3.99 | 4.91 | 5.43 | 4.38 | 3.41 | 3.23 | 3.12 | 3.03 | 3.24 | 3.27 | 3.03 | 3.7 |
| Phitsanulok | 3.27 | 4.01 | 4.99 | 5.32 | 4.71 | 3.78 | 3.65 | 3.51 | 3.27 | 3.55 | 3.42 | 3.19 | 3.9 |
| Phetchabun | 3.26 | 3.98 | 4.62 | 4.81 | 4.09 | 3.66 | 3.58 | 3.10 | 3.21 | 3.60 | 3.57 | 3.26 | 3.7 |
| Kamphaeng Phet | 3.26 | 3.91 | 4.35 | 5.01 | 4.45 | 3.92 | 3.50 | 3.41 | 3.55 | 3.48 | 3.34 | 3.11 | 3.8 |
| Sukhothai | 3.20 | 3.76 | 4.57 | 5.34 | 4.20 | 4.13 | 3.74 | 3.61 | 3.58 | 3.55 | 3.48 | 3.13 | 3.9 |
| Phichit | 3.28 | 3.89 | 4.35 | 4.60 | 4.05 | 3.98 | 3.50 | 3.40 | 3.19 | 3.47 | 3.58 | 3.24 | 3.7 |
| Nong Khai | 3.11 | 3.78 | 4.62 | 4.62 | 4.03 | 3.56 | 3.51 | 3.41 | 3.51 | 3.63 | 3.31 | 3.04 | 3.7 |
| Loei | 3.24 | 4.01 | 4.77 | 4.91 | 4.32 | 3.98 | 3.77 | 3.47 | 3.70 | 3.53 | 3.33 | 3.02 | 3.8 |
| Udon Thani | 3.32 | 4.07 | 4.85 | 5.21 | 4.56 | 4.08 | 3.71 | 3.55 | 3.61 | 3.73 | 3.70 | 3.22 | 4.0 |
| Sakon Nakhon | 3.29 | 3.92 | 4.68 | 5.01 | 4.38 | 4.13 | 3.72 | 3.57 | 3.92 | 3.84 | 3.51 | 3.17 | 3.9 |
| Nakhon Phanom | 3.43 | 3.95 | 4.39 | 4.73 | 4.12 | 3.86 | 3.62 | 3.33 | 3.66 | 3.59 | 3.60 | 3.21 | 3.8 |
| Khon Kaen | 3.43 | 4.00 | 4.79 | 4.87 | 4.46 | 4.10 | 3.88 | 3.52 | 3.55 | 3.69 | 3.66 | 3.41 | 3.9 |
| Mukdahan | 3.65 | 4.18 | 5.00 | 5.15 | 4.11 | 3.64 | 3.56 | 3.43 | 3.57 | 3.80 | 3.95 | 3.53 | 4.0 |
| Maha Sarakham | 3.57 | 4.19 | 4.71 | 5.22 | 4.62 | 4.22 | 3.84 | 3.64 | 3.62 | 3.76 | 3.83 | 3.58 | 4.1 |
| Kalasin | 4.15 | 4.89 | 5.40 | 5.45 | 4.80 | 4.32 | 4.22 | 3.65 | 3.71 | 4.06 | 4.30 | 4.10 | 4.4 |
| Chaiyaphum | 3.60 | 4.20 | 5.00 | 5.12 | 4.47 | 4.13 | 3.77 | 3.61 | 3.60 | 3.78 | 3.89 | 3.51 | 4.1 |
| Roi Et | 3.77 | 4.29 | 4.79 | 5.04 | 4.41 | 4.26 | 4.03 | 3.77 | 3.61 | 3.71 | 3.89 | 3.71 | 4.1 |
| Ubon Ratchathani | 3.82 | 4.11 | 4.58 | 4.58 | 4.05 | 3.80 | 3.72 | 3.29 | 3.33 | 3.53 | 3.94 | 3.82 | 3.9 |
| Si Sa Ket | 3.40 | 3.92 | 4.56 | 4.75 | 4.42 | 4.43 | 4.19 | 3.71 | 3.85 | 3.62 | 3.79 | 3.45 | 4.0 |
| Nakhon Ratchasima | 3.85 | 4.29 | 4.69 | 4.73 | 4.16 | 4.22 | 3.99 | 3.85 | 3.35 | 3.51 | 3.84 | 3.78 | 4.0 |
| Surin | 3.61 | 4.18 | 4.66 | 4.81 | 4.20 | 4.04 | 3.73 | 3.53 | 3.58 | 3.67 | 3.80 | 3.62 | 4.0 |
| Buri Ram | 3.90 | 4.49 | 5.04 | 5.22 | 4.56 | 4.33 | 4.04 | 3.61 | 3.62 | 3.81 | 4.02 | 3.78 | 4.2 |
| Nakhon Sawan | 3.83 | 4.61 | 5.47 | 5.50 | 4.51 | 4.06 | 3.91 | 3.60 | 3.45 | 3.56 | 3.69 | 3.59 | 4.1 |
| Chai Nat | 3.30 | 3.68 | 4.34 | 4.56 | 4.31 | 4.27 | 3.84 | 3.47 | 3.42 | 3.26 | 3.31 | 3.21 | 3.7 |
| Ayutthaya | 3.95 | 4.20 | 4.58 | 4.58 | 4.02 | 4.10 | 3.73 | 3.68 | 3.36 | 3.46 | 3.92 | 3.94 | 4.0 |
| Pathum Thani | 3.54 | 3.85 | 4.44 | 4.64 | 4.05 | 4.15 | 3.62 | 3.59 | 3.26 | 2.90 | 3.83 | 3.54 | 3.8 |
| Ratchaburi | 4.04 | 4.61 | 5.27 | 5.15 | 4.00 | 3.96 | 3.57 | 3.63 | 3.44 | 3.39 | 3.86 | 4.01 | 4.1 |
| Suphan Buri | 3.46 | 4.12 | 4.79 | 4.94 | 4.13 | 3.95 | 3.71 | 3.42 | 3.35 | 3.50 | 3.53 | 3.46 | 3.9 |
| Lop Buri | 3.90 | 4.61 | 5.13 | 5.06 | 4.17 | 3.75 | 3.66 | 3.31 | 3.26 | 3.65 | 3.86 | 3.88 | 4.0 |
| Kanchanaburi | 3.52 | 4.22 | 4.76 | 5.22 | 4.00 | 3.52 | 3.22 | 3.21 | 3.03 | 3.25 | 3.41 | 3.42 | 3.7 |
| Bangkok | 4.06 | 4.51 | 5.11 | 5.09 | 4.53 | 4.44 | 4.35 | 4.12 | 3.76 | 3.69 | 4.23 | 4.10 | 4.3 |
| Samut Prakan | 1.14 | 2.03 | 3.25 | 3.75 | 3.74 | 3.96 | 3.74 | 3.36 | 2.60 | 1.79 | 1.46 | 0.99 | 2.7 |
| Phetchaburi | 3.59 | 4.23 | 4.87 | 4.89 | 4.22 | 3.74 | 3.66 | 3.17 | 3.38 | 3.08 | 3.39 | 3.49 | 3.8 |
| Prachuap Khiri Khan | 3.84 | 4.31 | 4.64 | 4.83 | 4.19 | 3.98 | 3.70 | 3.54 | 3.48 | 3.42 | 3.66 | 3.88 | 4.0 |
| Nakhon Pathom | 3.70 | 4.35 | 5.15 | 5.12 | 4.02 | 4.00 | 3.63 | 3.16 | 3.44 | 3.69 | 3.92 | 3.66 | 4.0 |
| Chachoengsao | 3.85 | 3.83 | 4.19 | 4.31 | 3.86 | 3.52 | 3.46 | 3.46 | 3.26 | 3.33 | 3.47 | 3.51 | 3.7 |
| Prachinburi | 3.81 | 4.06 | 4.32 | 4.65 | 3.98 | 3.50 | 3.44 | 3.15 | 3.25 | 3.58 | 4.02 | 4.01 | 3.8 |
| Sa Kaeo | 3.93 | 4.41 | 4.83 | 4.79 | 4.04 | 3.97 | 3.72 | 3.50 | 3.30 | 3.53 | 3.77 | 3.71 | 4.0 |
| Chon Buri | 4.18 | 4.44 | 4.81 | 5.00 | 4.39 | 4.26 | 4.22 | 4.02 | 3.67 | 3.52 | 4.21 | 4.39 | 4.3 |
| Rayong | 3.66 | 3.98 | 4.32 | 4.54 | 4.08 | 3.97 | 3.75 | 3.74 | 3.42 | 3.43 | 3.71 | 3.69 | 3.9 |
| Chanthaburi | 3.83 | 3.72 | 4.03 | 4.28 | 3.43 | 3.11 | 3.10 | 2.84 | 2.95 | 3.33 | 3.81 | 3.91 | 3.5 |
| Trat | 3.80 | 3.83 | 4.17 | 4.28 | 3.89 | 3.35 | 3.32 | 2.87 | 3.22 | 3.35 | 3.68 | 3.84 | 3.6 |

**Table S1.** *Cont.*

| **Province** | ***ET*0 (mm/day)** | | | | | | | | | | | | |
| --- | --- | --- | --- | --- | --- | --- | --- | --- | --- | --- | --- | --- | --- |
| **Jan** | **Feb** | **Mar** | **Apr** | **May** | **Jun** | **Jul** | **Aug** | **Sep** | **Oct** | **Nov** | **Dec** | **Average** |
| Chumphon | 3.40 | 3.86 | 4.34 | 4.33 | 3.82 | 3.83 | 3.59 | 3.68 | 3.53 | 3.37 | 3.24 | 3.36 | 3.7 |
| Ranong | 3.84 | 4.21 | 4.29 | 4.27 | 3.76 | 3.34 | 3.27 | 3.30 | 3.20 | 3.31 | 3.41 | 3.52 | 3.6 |
| Surat Tani | 3.53 | 4.12 | 4.38 | 4.32 | 3.80 | 3.63 | 3.55 | 3.62 | 3.51 | 3.21 | 3.11 | 3.19 | 3.7 |
| Nakhon Si Thammarat | 3.32 | 3.77 | 4.10 | 4.15 | 3.69 | 3.65 | 3.53 | 3.64 | 3.53 | 3.18 | 2.99 | 2.94 | 3.5 |
| Phatthalung | 3.65 | 4.09 | 4.13 | 4.20 | 3.74 | 3.68 | 3.51 | 3.62 | 3.54 | 3.31 | 3.30 | 3.28 | 3.7 |
| Phuket | 4.19 | 4.50 | 4.53 | 4.27 | 3.79 | 3.77 | 3.76 | 3.83 | 3.51 | 3.35 | 3.34 | 3.73 | 3.9 |
| Krabi | 4.08 | 4.73 | 4.42 | 4.21 | 3.73 | 3.58 | 3.54 | 3.63 | 3.57 | 3.07 | 3.27 | 3.50 | 3.8 |
| Trang | 4.21 | 4.86 | 4.67 | 4.30 | 3.71 | 3.60 | 3.24 | 3.35 | 3.26 | 3.12 | 3.27 | 3.64 | 3.8 |
| Songkhla | 3.74 | 4.21 | 4.34 | 4.24 | 3.72 | 3.67 | 3.69 | 3.76 | 3.57 | 3.34 | 2.99 | 3.16 | 3.7 |
| Satun | 4.43 | 4.60 | 4.40 | 4.18 | 3.64 | 3.52 | 3.53 | 3.65 | 3.28 | 3.14 | 3.32 | 3.80 | 3.8 |
| Pattani | 3.36 | 3.95 | 3.91 | 3.95 | 3.49 | 3.39 | 3.42 | 3.52 | 3.48 | 3.25 | 2.95 | 2.85 | 3.5 |
| Yala | 3.53 | 4.20 | 4.25 | 4.31 | 3.77 | 3.66 | 3.66 | 3.80 | 3.75 | 3.59 | 2.94 | 3.10 | 3.7 |
| Narathiwat | 3.32 | 3.82 | 4.07 | 4.19 | 3.75 | 3.63 | 3.61 | 3.72 | 3.40 | 3.25 | 2.94 | 2.92 | 3.6 |

S1.2. Crop Coefficient (Kc)

To obtain the *K*c for each crop, the *ET*crop is obtained through lysimeter experiment and the *ET*0 is computed via the Penmen Monteith method and using meteorological data at location where the experiment is set. Hence the *K*c value is very useful for fields of irrigation and agriculture to estimate water requirement of crop which will be planted in area that no data and experimental station. Table S2 shows the *K*c values used in the calculations.

**Table S2.** Crop coefficient (*K*c) of studied crops in Thailand.

| **Week** | **1** | **2** | **3** | **4** | **5** | **6** | **7** | **8** | **9** | **10** | **11** | **12** | **13** | **14** | **15** | **16** | **Average** | **Sources** |
| --- | --- | --- | --- | --- | --- | --- | --- | --- | --- | --- | --- | --- | --- | --- | --- | --- | --- | --- |
| Rice (Direct Sowing) | 0.8 | 1.05 | 1.25 | 1.4 | 1.5 | 1.55 | 1.6 | 1.63 | 1.68 | 1.6 | 1.5 | 1.36 | 1.08 | 0.65 | – | – | 1.33 | [2] |
| Rice (Transplanting) | 1.03 | 1.07 | 1.12 | 1.29 | 1.38 | 1.45 | 1.5 | 1.48 | 1.42 | 1.34 | 1.23 | 0.94 | 0.86 | – | – | – | 1.24 | [2] |
| Maize | 0.63 | 0.72 | 0.86 | 1.13 | 1.35 | 1.52 | 1.61 | 1.63 | 1.58 | 1.5 | 1.38 | 1.15 | 0.9 | 0.67 | – | – | 1.19 | [2] |
| Soybean | 0.64 | 0.69 | 0.81 | 1.01 | 1.23 | 1.32 | 1.35 | 1.34 | 1.27 | 1.09 | 0.85 | 0.74 | 0.74 | 0.72 | – | – | 0.99 | [2] |
| Peanut | 0.6 | 0.72 | 0.85 | 0.94 | 1.17 | 1.24 | 1.28 | 1.36 | 1.04 | 0.99 | 0.91 | 0.77 | 0.6 | 0.5 | 0.45 |  | 0.89 | [2] |
| Mungbean | 0.58 | 0.87 | 1.18 | 1.4 | 1.28 | 1.19 | 0.66 | 0.44 | 0.34 | – | – | – | – | – | – | – | 0.88 | [2] |
| Sugarcane | 0.65 | 0.86 | 1.13 | 1.35 | 1.56 | 1.29 | 1.20 | 0.93 | 0.63 | 0.52 | – | – | – | – | – | – | 1.01 | [2] |
| Cassava | 0.28 | 0.29 | 0.32 | 0.34 | 0.50 | 0.72 | 0.99 | 1.13 | 1.01 | 0.79 | 0.58 | 0.42 | – | – | – | – | 0.61 | [3] |
| Oil palm | – | – | – | – | – | – | – | – | – | – | – | – | – | – | – | – | 1 | [4] |
| Coconut | – | – | – | – | – | – | – | – | – | – | – | – | – | – | – | – | 1 | [4] |

S1.3. Effective Rainfall

In agriculture, rainfall is considered in terms of the amount of rainfall used by plants named as effective rainfall; therefore, the green water corresponds to the effective rainfall. The effective rainfall (mm) data used in the study is shown in Table S3 and the method to estimate the effective rainfall is referred to the RID is presented in Table S4.

**Table S3.** Effective rainfall (mm) in year 2011 classified by provinces.

| **Province** | **Effective Rainfall (mm)** | | | | | | | | | | | |
| --- | --- | --- | --- | --- | --- | --- | --- | --- | --- | --- | --- | --- |
| **Jan** | **Feb** | **Mar** | **Apr** | **May** | **Jun** | **Jul** | **Aug** | **Sep** | **Oct** | **Nov** | **Dec** |
| Mae Hong Son | 11.2 | 0.0 | 79.7 | 63.2 | 125.6 | 147.1 | 150.2 | 170.7 | 140.8 | 108.4 | 18.9 | 0.0 |
| Chiang Rai | 21.2 | 0.0 | 71.9 | 75.2 | 143.8 | 136.6 | 149.8 | 287.4 | 159.5 | 66.8 | 0.0 | 0.0 |
| Phayao | 0.0 | 0.0 | 54.3 | 119.9 | 148.2 | 122.8 | 143.8 | 132.4 | 112.9 | 78.4 | 0.0 | 0.0 |
| Chiang Mai | 0.0 | 0.0 | 48.3 | 74.1 | 161.0 | 130.1 | 133.8 | 143.3 | 140.2 | 55.8 | 0.0 | 0.0 |
| Lampang | 0.0 | 0.0 | 65.1 | 73.4 | 176.1 | 135.0 | 145.3 | 153.9 | 157.3 | 127.6 | 0.0 | 0.0 |
| Lamphun | 0.0 | 0.0 | 58.8 | 109.7 | 163.2 | 121.1 | 139.4 | 149.6 | 159.2 | 72.9 | 35.7 | 0.0 |
| Phrae | 0.0 | 0.0 | 72.7 | 148.7 | 119.3 | 119.6 | 152.8 | 140.2 | 144.7 | 55.1 | 0.0 | 0.0 |
| Nan | 0.0 | 0.0 | 63.2 | 109.8 | 145.4 | 166.1 | 193.4 | 173.0 | 189.7 | 51.0 | 14.6 | 0.0 |
| Uttaradit | 0.0 | 0.0 | 112.5 | 138.1 | 116.8 | 121.1 | 155.0 | 205.1 | 250.5 | 110.7 | 0.0 | 0.0 |
| Tak | 0.0 | 0.0 | 117.1 | 77.9 | 143.9 | 156.9 | 145.3 | 144.6 | 162.0 | 128.4 | 0.0 | 0.0 |
| Phitsanulok | 0.0 | 17.2 | 77.3 | 73.9 | 125.6 | 141.3 | 151.5 | 184.1 | 190.3 | 88.5 | 25.4 | 0.0 |
| Phetchabun | 0.0 | 23.9 | 60.1 | 72.3 | 150.5 | 79.9 | 133.3 | 126.1 | 177.0 | 54.8 | 16.2 | 0.0 |
| Kamphaengphet | 0.0 | 0.0 | 87.3 | 37.6 | 163.5 | 85.8 | 148.6 | 76.1 | 184.4 | 134.6 | 21.8 | 0.0 |
| Sukhothai | 0.0 | 0.0 | 82.6 | 139.9 | 128.9 | 134.4 | 111.3 | 151.7 | 181.7 | 146.1 | 0.0 | 0.0 |
| Phichit | 0.0 | 0.0 | 70.9 | 101.9 | 142.1 | 140.6 | 181.4 | 142.3 | 242.5 | 116.0 | 32.0 | 11.0 |
| Nakhon Sawan | 0.0 | 13.3 | 59.3 | 93.3 | 151.4 | 78.6 | 125.6 | 151.4 | 146.6 | 103.2 | 30.1 | 0.0 |
| Nong Khai | 0.0 | 0.0 | 49.4 | 35.1 | 135.2 | 144.6 | 350.4 | 174.5 | 287.2 | 129.0 | 0.0 | 0.0 |
| Loei | 0.0 | 14.2 | 63.2 | 30.8 | 127.2 | 124.0 | 147.0 | 185.0 | 214.1 | 127.4 | 12.1 | 0.0 |
| Udon Thani | 0.0 | 18.5 | 34.0 | 80.4 | 111.1 | 90.6 | 196.3 | 166.8 | 151.1 | 129.4 | 33.7 | 0.0 |
| Nongbualumphu | 0.0 | 11.0 | 53.4 | 79.9 | 120.5 | 150.4 | 150.8 | 174.5 | 231.3 | 53.6 | 11.3 | 0.0 |
| Sakon Nakhon | 0.0 | 11.9 | 16.9 | 76.8 | 170.1 | 141.5 | 170.3 | 237.4 | 136.9 | 126.7 | 0.0 | 0.0 |
| Nakhon Phanom | 0.0 | 0.0 | 16.4 | 61.1 | 140.6 | 190.0 | 315.6 | 314.0 | 263.0 | 55.3 | 0.0 | 0.0 |
| Khon Kaen | 0.0 | 0.0 | 11.0 | 43.3 | 80.3 | 106.6 | 137.4 | 131.2 | 150.9 | 133.9 | 0.0 | 0.0 |
| Mukdahan | 0.0 | 9.1 | 0.0 | 34.7 | 112.9 | 192.1 | 165.0 | 266.2 | 138.9 | 58.7 | 0.0 | 0.0 |
| Maha Sarakham | 0.0 | 50.5 | 0.0 | 29.9 | 133.4 | 51.9 | 188.0 | 117.3 | 192.7 | 56.5 | 0.0 | 0.0 |
| Kalasin | 0.0 | 0.0 | 18.6 | 33.7 | 110.1 | 122.3 | 127.8 | 191.7 | 194.2 | 81.3 | 0.0 | 0.0 |
| Chaiyaphum | 0.0 | 0.0 | 0.0 | 111.2 | 111.0 | 73.6 | 91.6 | 162.9 | 155.2 | 73.2 | 0.0 | 0.0 |
| Roi Et | 0.0 | 0.0 | 27.8 | 76.4 | 131.7 | 78.4 | 122.8 | 147.2 | 258.1 | 76.7 | 0.0 | 0.0 |
| Ubon Ratchathani | 0.0 | 10.5 | 11.6 | 73.6 | 142.5 | 139.1 | 123.8 | 229.7 | 169.8 | 137.5 | 0.0 | 0.0 |
| Si Sa Ket | 0.0 | 0.0 | 18.2 | 69.4 | 140.6 | 113.3 | 74.8 | 219.6 | 221.0 | 162.3 | 0.0 | 0.0 |
| Nakhon Ratchasima | 0.0 | 24.5 | 18.1 | 73.0 | 109.7 | 72.9 | 123.8 | 106.2 | 151.0 | 140.7 | 0.0 | 0.0 |
| Surin | 0.0 | 23.3 | 10.0 | 53.9 | 123.2 | 146.6 | 156.5 | 144.9 | 151.3 | 153.2 | 0.0 | 0.0 |
| Buri Ram | 0.0 | 0.0 | 0.0 | 74.5 | 155.0 | 74.9 | 139.5 | 154.9 | 141.9 | 123.5 | 0.0 | 0.0 |
| Chai Nat | 0.0 | 0.0 | 61.6 | 56.1 | 125.0 | 119.9 | 133.1 | 76.7 | 145.6 | 100.7 | 0.0 | 0.0 |
| Ayuttaya | 0.0 | 17.2 | 54.9 | 14.3 | 136.4 | 81.1 | 125.8 | 92.7 | 155.8 | 73.0 | 0.0 | 0.0 |
| Pathumthani | 0.0 | 60.1 | 102.1 | 61.8 | 143.1 | 68.9 | 81.1 | 117.3 | 153.8 | 148.7 | 0.0 | 0.0 |

**Table S3.** *Cont.*

| **Province** | **Effective Rainfall (mm)** | | | | | | | | | | | |
| --- | --- | --- | --- | --- | --- | --- | --- | --- | --- | --- | --- | --- |
| **Jan** | **Feb** | **Mar** | **Apr** | **May** | **Jun** | **Jul** | **Aug** | **Sep** | **Oct** | **Nov** | **Dec** |
| Ratchaburi | 0.0 | 0.0 | 40.2 | 42.2 | 94.1 | 30.0 | 98.8 | 79.6 | 77.4 | 147.1 | 0.0 | 0.0 |
| Suphan Buri | 0.0 | 0.0 | 69.0 | 26.4 | 124.4 | 72.7 | 87.2 | 74.3 | 131.8 | 130.2 | 0.0 | 0.0 |
| Lop Buri | 0.0 | 0.0 | 21.0 | 71.2 | 107.8 | 79.0 | 99.4 | 86.7 | 187.9 | 104.3 | 0.0 | 0.0 |
| Kanchanaburi | 0.0 | 29.4 | 130.1 | 74.6 | 135.0 | 122.8 | 134.0 | 144.0 | 122.4 | 91.6 | 0.0 | 0.0 |
| Bangkok | 0.0 | 30.3 | 106.4 | 97.7 | 147.1 | 174.8 | 159.6 | 176.1 | 143.0 | 150.4 | 0.0 | 0.0 |
| Samut Prakan | 0.0 | 48.0 | 27.8 | 54.3 | 71.0 | 117.0 | 88.8 | 131.9 | 129.3 | 133.3 | 0.0 | 0.0 |
| Phetchaburi | 0.0 | 0.0 | 112.1 | 52.6 | 69.4 | 62.2 | 97.1 | 87.6 | 90.4 | 135.0 | 0.0 | 0.0 |
| Prachuap Khiri Khan | 0.0 | 0.0 | 75.6 | 11.9 | 79.1 | 75.5 | 113.1 | 65.7 | 39.7 | 117.1 | 0.0 | 19.3 |
| Nakhon Pathom | 0.0 | 0.0 | 43.0 | 98.4 | 88.1 | 80.5 | 75.5 | 140.1 | 117.7 | 175.3 | 0.0 | 0.0 |
| Chacherngsao | 0.0 | 24.0 | 74.6 | 126.7 | 144.4 | 103.1 | 125.3 | 139.9 | 181.4 | 115.4 | 12.5 | 0.0 |
| Prachin Buri | 0.0 | 29.4 | 73.8 | 78.4 | 112.9 | 127.1 | 153.1 | 149.2 | 208.6 | 129.2 | 0.0 | 0.0 |
| Sa Kaeo | 0.0 | 30.7 | 38.0 | 127.1 | 102.0 | 137.8 | 129.9 | 151.0 | 158.6 | 147.9 | 0.0 | 0.0 |
| Chon Buri | 0.0 | 43.0 | 74.8 | 77.3 | 89.6 | 93.5 | 79.9 | 126.3 | 126.7 | 146.6 | 0.0 | 0.0 |
| Rayong | 0.0 | 81.2 | 87.1 | 136.1 | 75.0 | 143.6 | 116.7 | 169.9 | 151.7 | 159.9 | 22.5 | 0.0 |
| Chanthaburi | 0.0 | 24.7 | 75.7 | 140.0 | 152.4 | 271.6 | 224.0 | 255.7 | 452.4 | 141.7 | 30.6 | 0.0 |
| Trat | 0.0 | 67.0 | 141.4 | 161.4 | 176.8 | 403.0 | 447.9 | 356.3 | 723.4 | 313.4 | 0.0 | 26.3 |
| Chumphon | 36.9 | 9.9 | 268.7 | 33.6 | 130.2 | 130.1 | 116.0 | 89.2 | 130.5 | 122.6 | 154.2 | 67.7 |
| Ranong | 37.0 | 31.9 | 196.7 | 60.0 | 273.2 | 210.2 | 443.7 | 280.5 | 455.8 | 132.8 | 21.8 | 16.8 |
| Surat Thani | 127.2 | 52.0 | 482.4 | 34.1 | 80.2 | 71.7 | 92.3 | 115.4 | 93.9 | 137.1 | 86.9 | 126.4 |
| Nakhon Si Thammarat | 228.0 | 27.4 | 553.7 | 75.6 | 124.1 | 74.5 | 92.6 | 131.0 | 103.1 | 161.2 | 207.7 | 158.1 |
| Phatthalung | 199.3 | 17.6 | 427.9 | 96.9 | 19.8 | 91.1 | 59.4 | 121.2 | 125.1 | 166.5 | 291.5 | 316.0 |
| Phang Nga | 68.3 | 47.4 | 280.7 | 128.6 | 203.0 | 198.4 | 226.4 | 386.5 | 297.1 | 236.2 | 113.6 | 73.3 |
| Phuket | 61.4 | 13.4 | 231.2 | 82.4 | 117.1 | 121.4 | 124.7 | 225.2 | 159.0 | 245.9 | 133.4 | 65.9 |
| Krabi | 69.7 | 0.0 | 194.2 | 37.3 | 80.9 | 97.8 | 166.3 | 161.6 | 161.6 | 135.8 | 132.6 | 79.8 |
| Trang | 86.2 | 0.0 | 224.4 | 85.8 | 109.4 | 74.2 | 165.6 | 125.1 | 164.6 | 116.9 | 138.9 | 97.0 |
| Songkhla | 102.9 | 0.0 | 151.9 | 72.2 | 108.5 | 74.9 | 65.9 | 120.8 | 123.8 | 136.8 | 198.4 | 246.8 |
| Satun | 23.4 | 0.0 | 204.6 | 82.6 | 151.0 | 130.1 | 73.6 | 195.6 | 240.4 | 83.2 | 138.3 | 79.3 |
| Pattani | 101.2 | 0.0 | 127.9 | 77.3 | 127.9 | 112.8 | 100.5 | 101.2 | 63.8 | 147.7 | 258.8 | 250.5 |
| Yala | 182.4 | 12.6 | 147.6 | 72.0 | 135.7 | 163.1 | 106.1 | 159.2 | 57.0 | 139.9 | 304.1 | 359.2 |
| Narathiwat | 186.9 | 14.6 | 382.3 | 33.1 | 122.4 | 119.9 | 93.5 | 144.9 | 133.8 | 161.9 | 366.1 | 451.0 |

**Table S4.** Effective rainfall estimation method [4,5].

| **Average Monthly Rainfall (mm)** | **Effective Rainfall (% of Monthly Rainfall)** |
| --- | --- |
| 0–10 | 0 |
| 11–100 | 80% |
| 101–200 | 70% |
| 201–250 | 60% |
| 251–300 | 55% |
| >301 | 50% |

S2. Determination of the “Withdrawal-to-Availability” (WTA)

To determine the WTA, the secondary data regarding water demand for various purposes and water supply are based on available data at several governmental departments e.g., the Royal Irrigation Department (RID), Electricity Generating Authority of Thailand (EGAT) and Thailand Meteorological Department (TMD) combined with the theoretical calculations. The estimated water withdrawal for different watersheds in Thailand obtained from the RID are classified into four sections *i.e.*, agricultural, domestic, industrial, and livestock sectors.Methodologies e.g., water intensity and assumptions used for assessing the water demands for different sectors are referred from the work manual of RID and are summarized in Tables S5–S7.

Water demand for industry is assessed based on types of industries and their areas as can be seen in table below. 10 major industrial sectors classified by the Department of Industrial Works (DIW). Tourism is accounted as one of the industrial sectors in this assessment and the water intensity of tourism sector will be assessed based on number of tourist and excursionist.

**Table S5.** Water demand for industrial sector [6,7].

| **Categories** | **Water Consumption (m3/rai #/day)** |
| --- | --- |
| Accessory | 6 |
| Chemical | 8 |
| Food | 12 |
| Metal | 5 |
| Other (General industry) | 7 |
| Outside | 4 |
| Paper | 4 |
| Textile | 5 |
| Non-metal | 8 |
| Wood | 3 |
| Categories | Water consumption (L/person/day) |
| Tourist | 350 |
| Excursionist | 30 |

Note: # rai = 0.16 hectare

Water demand for agriculture is assessed based on water required by crops and cultivated areas relating to effective rainfall, water loss via conveyance, and irrigation efficiency as can be expressed in the equation below:

|  | (2) |
| --- | --- |

**Table S6.** Water demand for livestock sector [6,7].

| **Livestock** | **Daily Water Use Per Head of Livestock (L/animal/day)** |
| --- | --- |
| Cow | 80 |
| Pig | 20 |
| Goat/Sheep | 15 |
| Poultry | 0.5 |

**Table S7.** Water demand for domestic [6,7].

| **Communities** | **Water Consumption (L/person/day)** |
| --- | --- |
| City municipal | 250 |
| Town municipality | 200 |
| Commune municipality | 120 |
| Out of municipality | 50 |

Water demand for livestock is estimated from *No*live × *WU*live; where, *No*live is the number of each livestock and *WU*live is water use unit per head of each livestock. Table S6 shows the water use per head of each livestock referred from RID (2011).

Water demand for domestic is assessed based on the number of population living in community. The estimated water requirements of households are based on the standard practice for investigation of basic minimum needs classified by four types of communities.

S3. Estimations of Water Availability (WA*i*) for Each Watershed

Table S8 shows the estimated water availability classified by watersheds which is used for WTA calculations in the manuscript. The water availability are estimated from the summation between the stored water in reservoirs as presented in Table S9 and the average annual rainfall data. According to the rainfall statistics by provinces during 2002–2011, the average annual rainfall of about 1710 mm was calculated and the total volume of water from rainfall was around 728,000–800,000 million m3.

**Table S8.** Estimated water availability classified by each basin [8].

| **Watersheds** | **Water Availability (million m3/year)** | | |
| --- | --- | --- | --- |
| **Stored Water** | **Surface Water (Rainfall)** | **Total** |
| Salawin | 25 | 25,303 | 25,327 |
| Kok | 97 | 9982 | 10,079 |
| Ping | 698 | 45,765 | 46,463 |
| Wang | 454 | 13,993 | 14,447 |
| Yom | 450 | 32,204 | 32,654 |
| Nan | 917 | 46,285 | 47,201 |
| Khong | 1719 | 88,356 | 90,075 |
| Chi | 2280 | 68,549 | 70,829 |

**Table S8.** *Cont.*

| **Watersheds** | **Water Availability (million m3/year)** | | |
| --- | --- | --- | --- |
| **Stored Water** | **Surface Water (Rainfall)** | **Total** |
| Mun | 2546 | 96,929 | 99,475 |
| Chao Phraya | 63 | 25,037 | 25,100 |
| Sakae Krang | 232 | 6619 | 6851 |
| Pasak | 1145 | 18,281 | 19,425 |
| Thachin | 323 | 16,130 | 16,453 |
| Mae Klong | 288 | 34,890 | 35,178 |
| Petchaburi | 750 | 6381 | 7132 |
| West Coast Gulf | 650 | 9367 | 10,017 |
| Prachin Buri | 153 | 16,449 | 16,601 |
| Bang Pakong | 623 | 16,837 | 17,459 |
| Thole Sap | 140 | 11,104 | 11,244 |
| East-Coast Gulf | 808 | 29,558 | 30,365 |
| Peninsula-East coast | 169 | 58,684 | 58,853 |
| Tapi | 161 | 26,823 | 26,984 |
| Thale sap Songkhla | 53 | 17,909 | 17,962 |
| Pattani | 2 | 8709 | 8711 |
| Peninsula-West coast | 57 | 56,200 | 56,258 |

**Table S9.** Water reservoirs classified by 25 watersheds [8].

| **Watersheds** | **Large and Medium Projects** | | | **Total Projects** | | | |
| --- | --- | --- | --- | --- | --- | --- | --- |
| **No. of Projects** | **Stored Water (M. m3)** | **Irrigated Area (rai)** | **No. of Projects** | **Stored Water (M. m3)** | **Irrigated  Area (rai)** | **Command Area (rai)** |
| Salawin | 16 | 13.8 | 41,260 | 343 | 24.70 | 93,506 | 114,262 |
| Kok | 8 | 73 | 276,200 | 213 | 96.88 | 331,470 | 262,675 |
| Ping | 57 | 14,122.5 | 2,137,041 | 1172 | 697.60 | 2,002,071 | 1,277,528 |
| Wang | 11 | 350.7 | 299,067 | 348 | 454.22 | 429,462 | 207,469 |
| Yom | 36 | 306.3 | 752,440 | 675 | 449.99 | 958,657 | 766,732 |
| Nan | 66 | 10,354.4 | 1,127,814 | 976 | 916.50 | 1,687,078 | 535,246 |
| Khong | 135 | 1309.9 | 1,034,035 | 2471 | 1718.68 | 1,790,896 | 1,373,239 |
| Chi | 96 | 4462.6 | 1,474,056 | 2228 | 2279.81 | 2,782,529 | 730,153 |
| Mun | 164 | 4141.8 | 1,600,305 | 2798 | 2546.04 | 2,089,709 | 1,528,688 |
| Chao Phraya | 39 | 37.7 | 6,118,666 | 380 | 62.66 | 6,228,463 | 998,683 |
| Sakae Krang | 7 | 230.0 | 279,148 | 141 | 231.71 | 312,548 | 161,810 |
| Pasak | 25 | 1124.4 | 510,970 | 418 | 1144.53 | 520,034 | 432,792 |
| Thachin | 16 | 294.5 | 2,441,126 | 414 | 322.65 | 2,503,776 | 610,055 |
| Mae Klong | 28 | 26,728.1 | 1,461,500 | 371 | 287.75 | 1,607,041 | 319,723 |
| Petchaburi | 13 | 714.4 | 360,530 | 155 | 750.13 | 383,100 | 92,780 |
| West Coast Gulf | 21 | 599.5 | 307,620 | 350 | 650.35 | 340,494 | 307,603 |
| Prachin Buri | 25 | 141.8 | 527,215 | 310 | 152.76 | 661,487 | 162,865 |
| Bang Pakong | 19 | 607.7 | 1,323,190 | 284 | 622.70 | 1,350,320 | 206,056 |
| Thole Sap | 3 | 137.0 | 97,900 | 151 | 139.66 | 99,850 | 68,670 |
| East-Coast Gulf | 42 | 781.7 | 508,800 | 375 | 807.59 | 640,470 | 241,590 |
| Peninsula-East coast | 31 | 95.8 | 1,345,844 | 1,083 | 169.28 | 1,491,074 | 639,450 |

**Table S9.** *Cont.*

| **Watersheds** | **Large and Medium Projects** | | | **Total Projects** | | | |
| --- | --- | --- | --- | --- | --- | --- | --- |
| **No. of Projects** | **Stored Water (M. m3)** | **Irrigated Area (rai)** | **No. of Projects** | **Stored Water (M. m3)** | **Irrigated  Area (rai)** | **Command Area (rai)** |
| Tapi | 21 | 5800.2 | 61,615 | 146 | 161.42 | 107,465 | 89,630 |
| Thale sap Songkhla | 19 | 52.4 | 620,190 | 213 | 52.56 | 691,175 | 219,316 |
| Pattani | 4 | 1404.0 | 241,850 | 201 | 1.94 | 250,990 | 58,574 |
| Peninsula-West coast | 21 | 32.8 | 150,110 | 566 | 57.37 | 249,627 | 211,052 |

The stored water in water reservoirs will become the water supply source for irrigation and waterworks. The numbers of reservoirs are referred to the irrigated water projects under the RID and other governmental agencies e.g., the EGAT and classified into large, medium, and small scale projects, electrical water pump project, and detention storage project (known as “Kaem Ling Project”).

References

1. Royal Irrigation Department (RID). *Reference Crop Evapotranspiration by Penmen Monteith*,
   2nd ed.; Office of Hydrology and Water Management, Royal Irrigation Department: Bangkok, Thailand, 2011.
2. Royal Irrigation Department (RID). *Crop Coefficient of 40 Varieties*; Office of Hydrology and Water Management, Royal Irrigation Department: Bangkok, Thailand, 2011.
3. Kwanyuen, B.; Numkhang, P.; PhuthongSook, W.; Tonwiboonsak, S. The Study of Cassava’s Crop Coefficient (*K*c). The 11th Thai Society of Agricultural Engineering International Conference, Bangkok, Thailand, 5–6 May 2010.
4. Royal Irrigation Department (RID). Estimation of crop water requirement during crop cultivation. Available Online: http://water.rid.go.th/hwm/cropwat/estimate_ET.pdf (accessed on 17 October 2012).
5. Royal Irrigation Department (RID). Crop water requirement for project planning. Available Online: http://irrigation.rid.go.th/rid14/download/waterFull.pdf (accessed on 14 May 2012)
6. Royal Irrigation Department (RID). *Planning on Irrigation Development for 25 Watersheds*; Office of Water Management and Hydrology, Royal Irrigation Department: Bangkok,
   Thailand, 2011
7. Royal Irrigation Department (RID). Work manual No.8/16: Assessing water consumption by sectors. Available Online: http://irrigation.rid.go.th/rid10/om/Work%20Manual/manual-08.pdf (accessed on 17 October 2012).
8. Royal Irrigation Department (RID). Summary Report of Development Plan of Irrigation at Watershed System. Available Online: http://kromchol.rid.go.th/ffd/2011/opm1/RID_Report.pdf (accessed on 17 October 2012).
